# Supplementary material
Source: publisher figshare collection journal article supplement (https://tandf.figshare.com/articles/dataset/_/5766558)

Westside

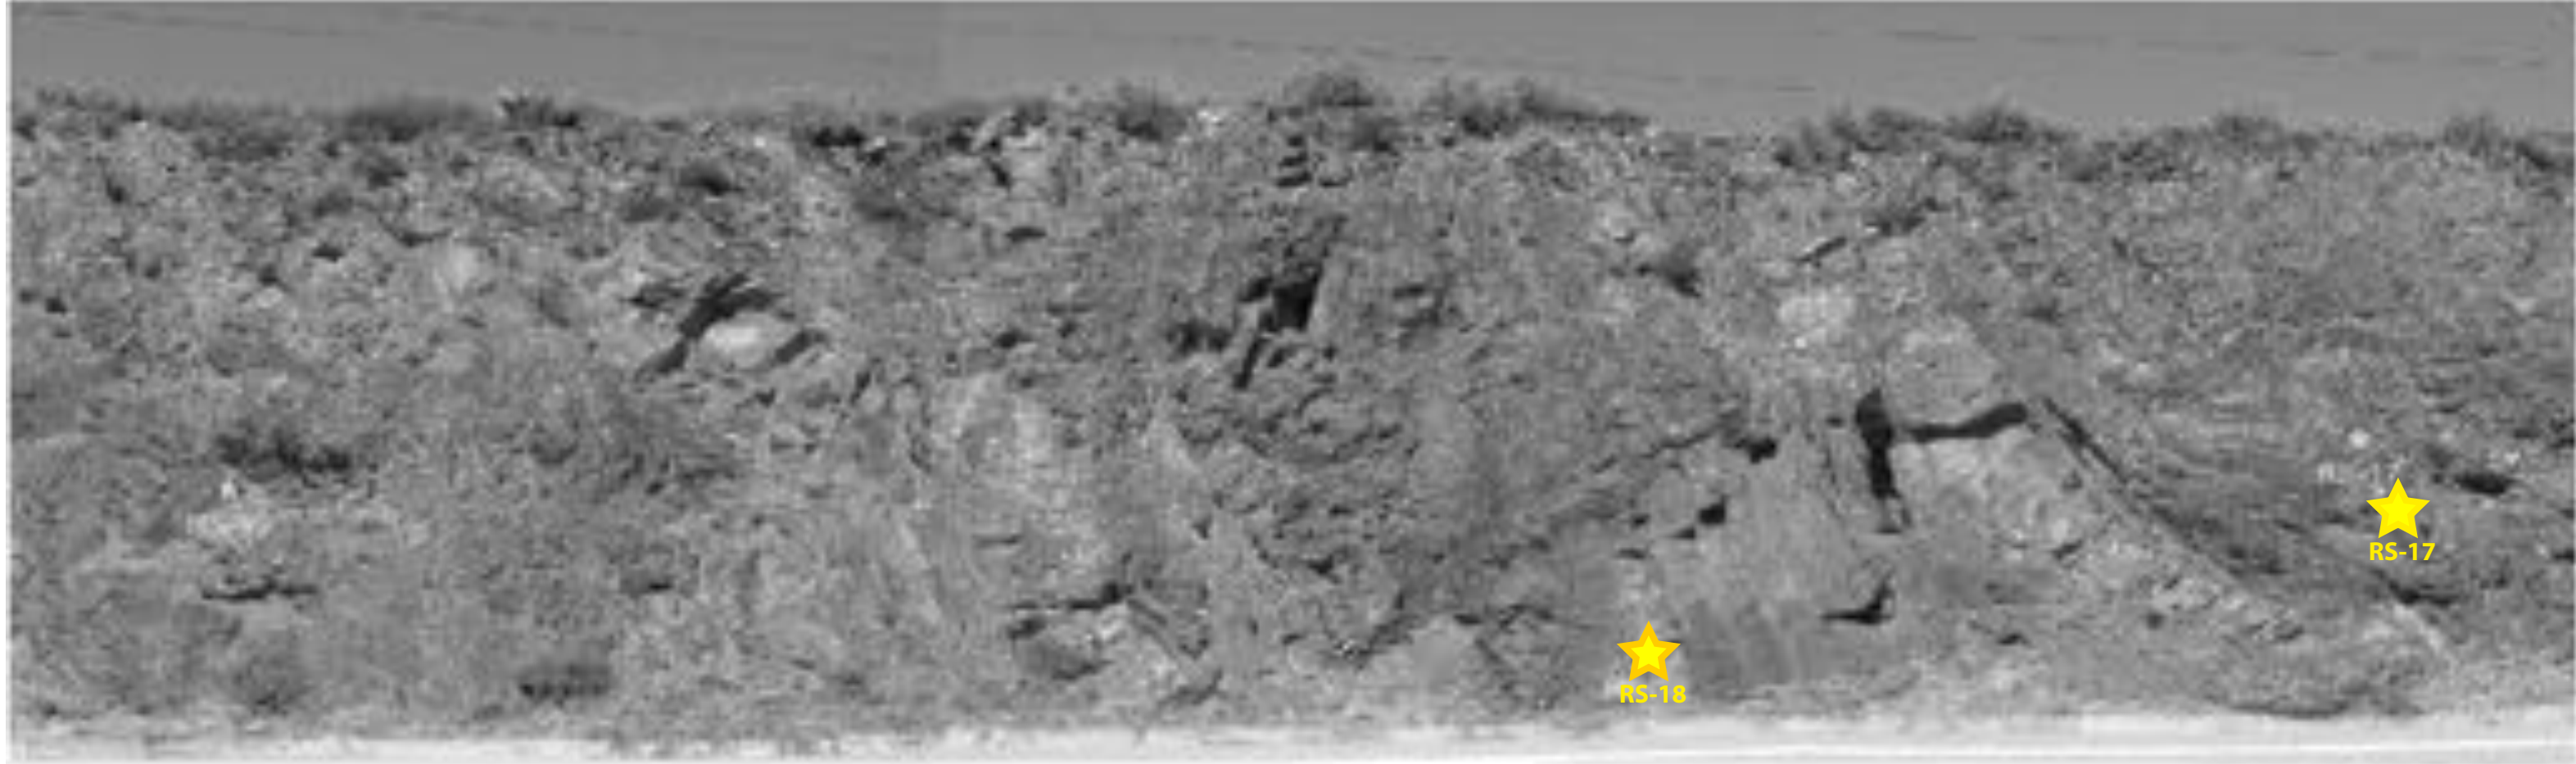

Eastside

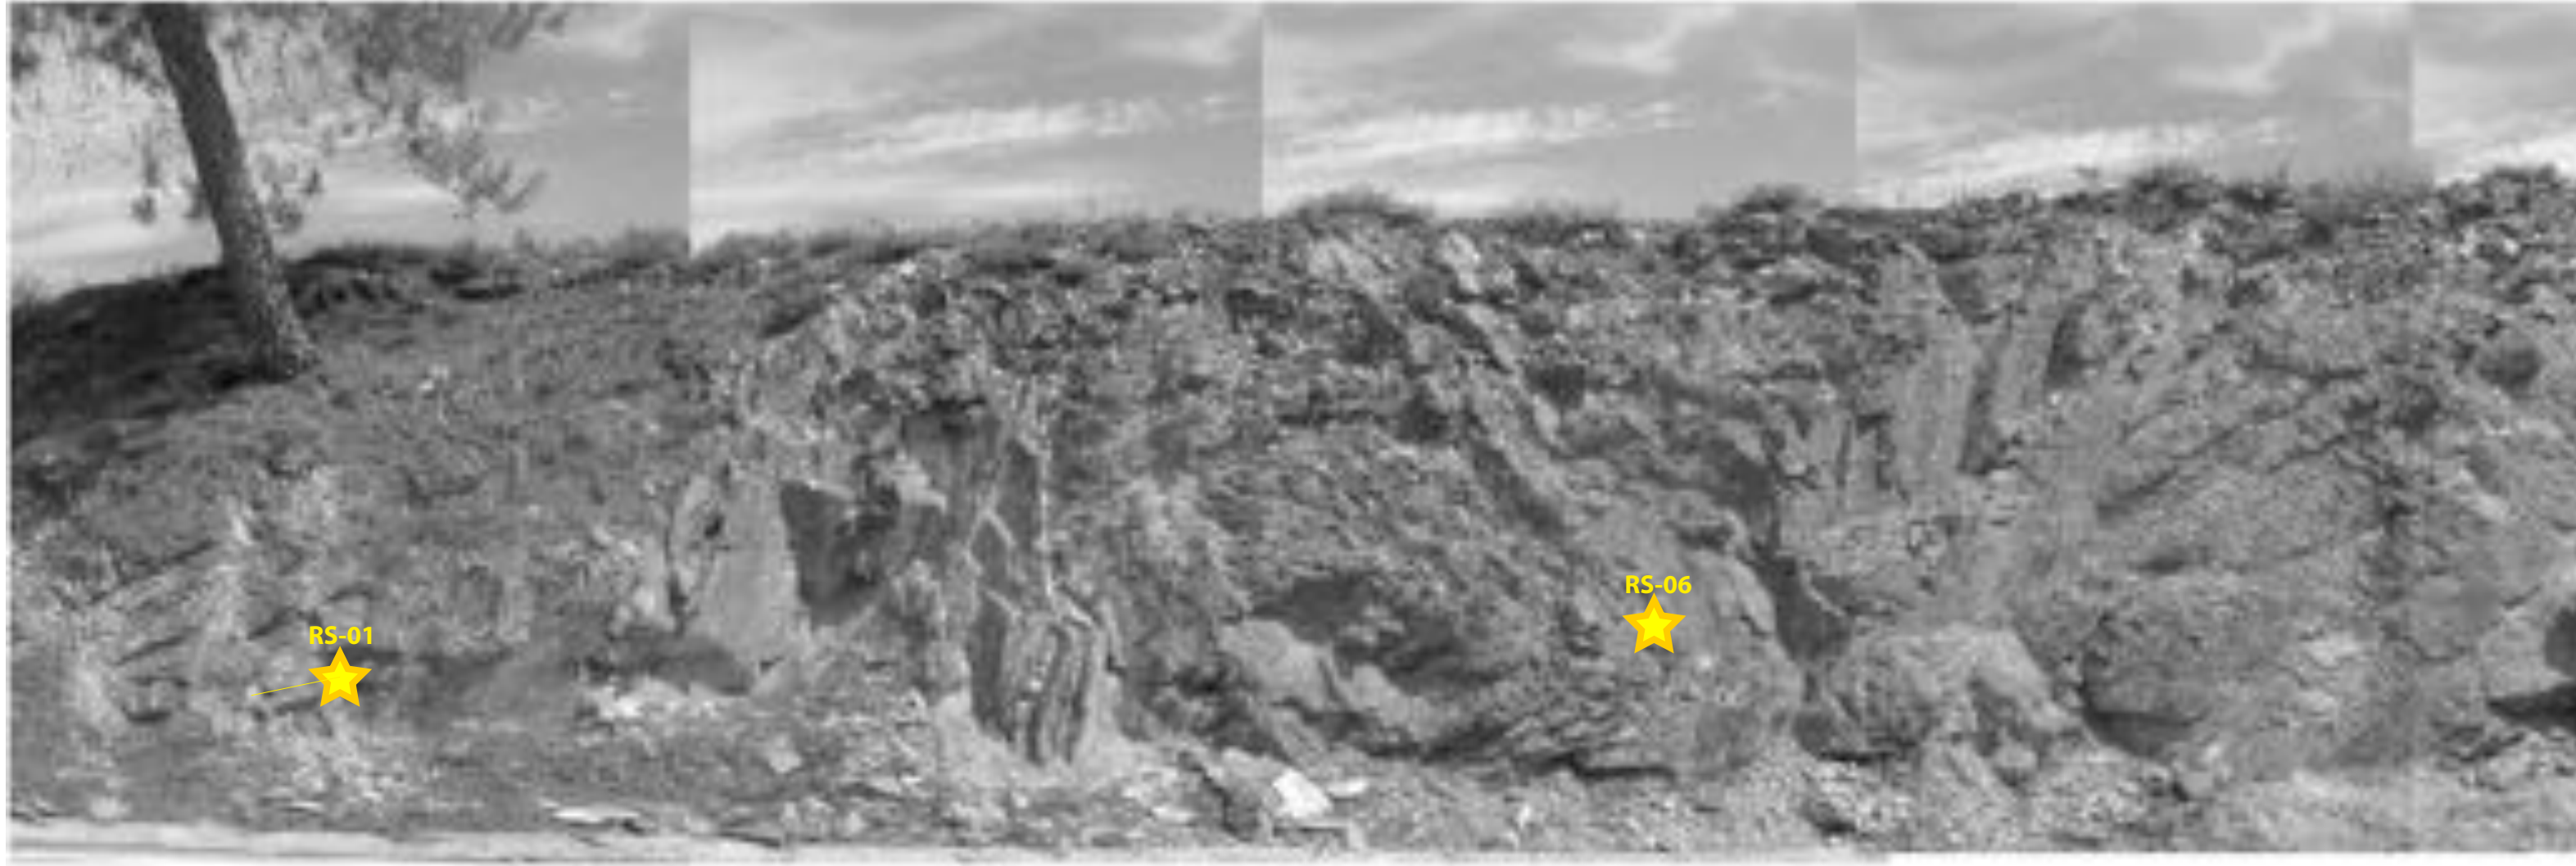



Westside

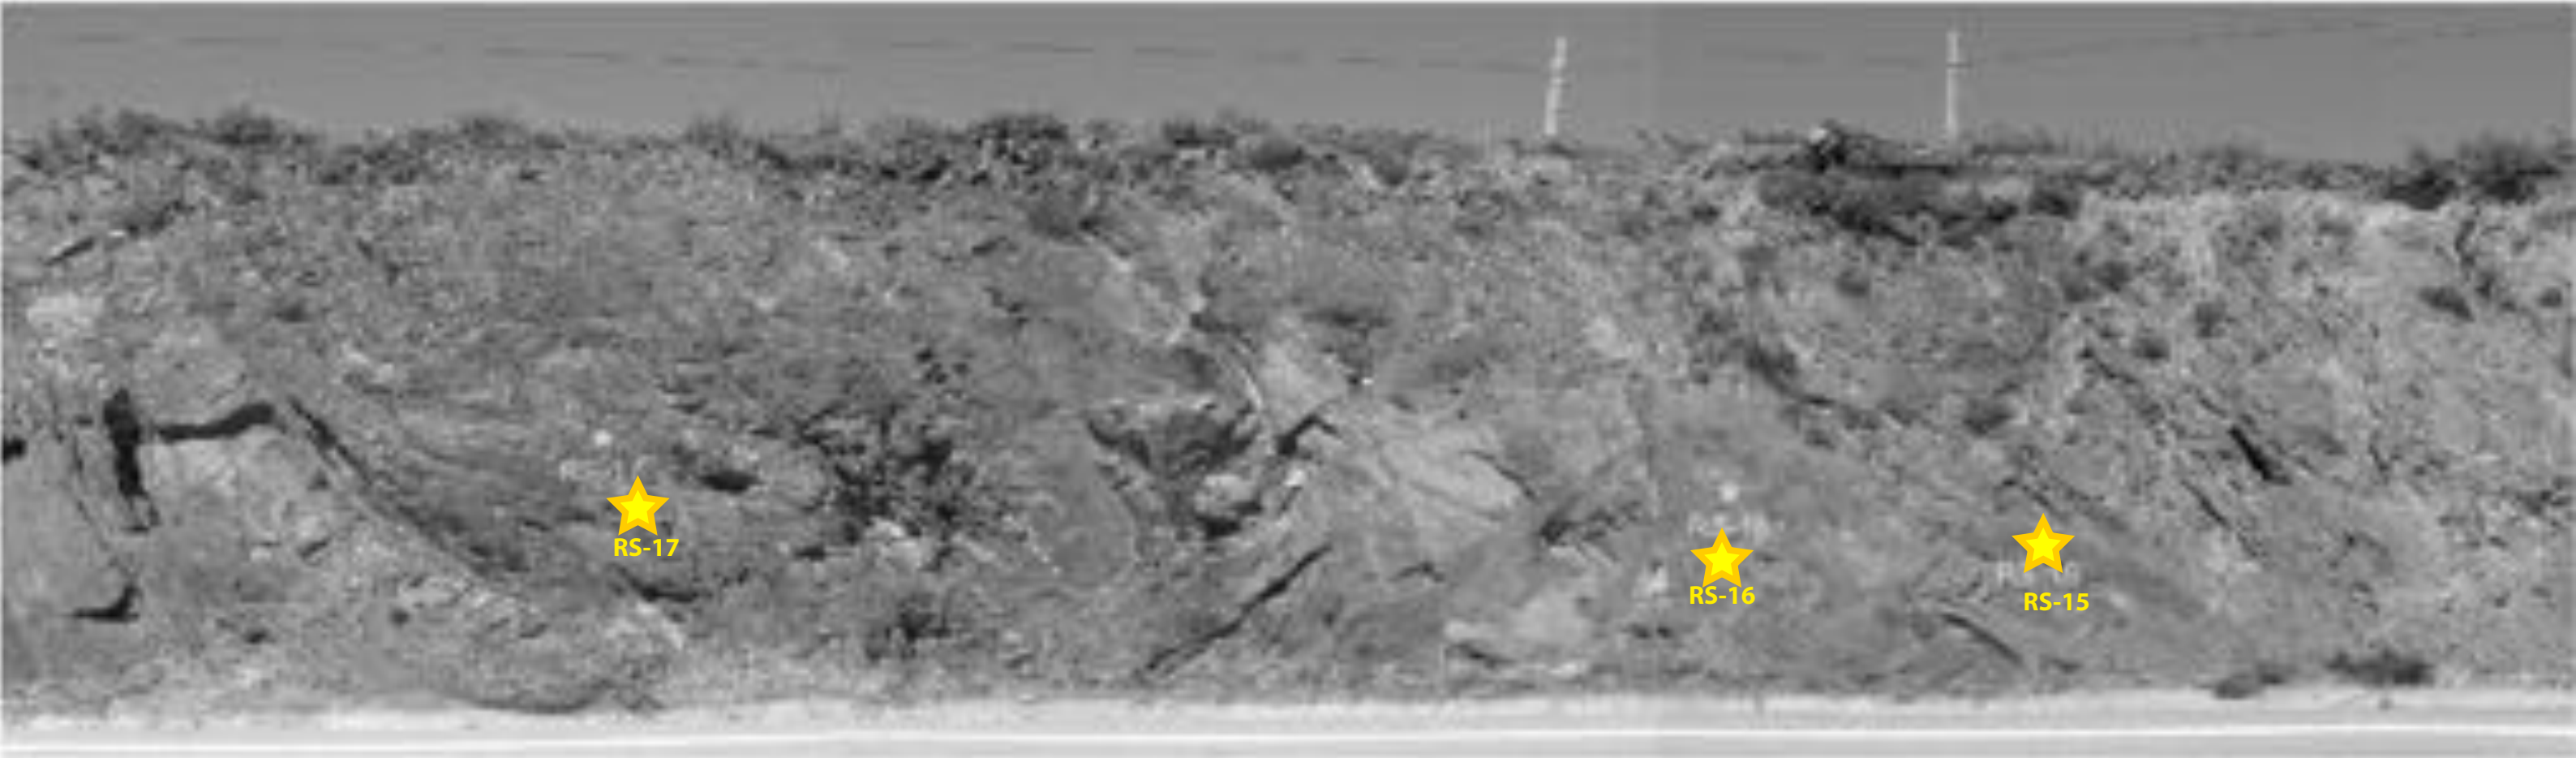

Eastside

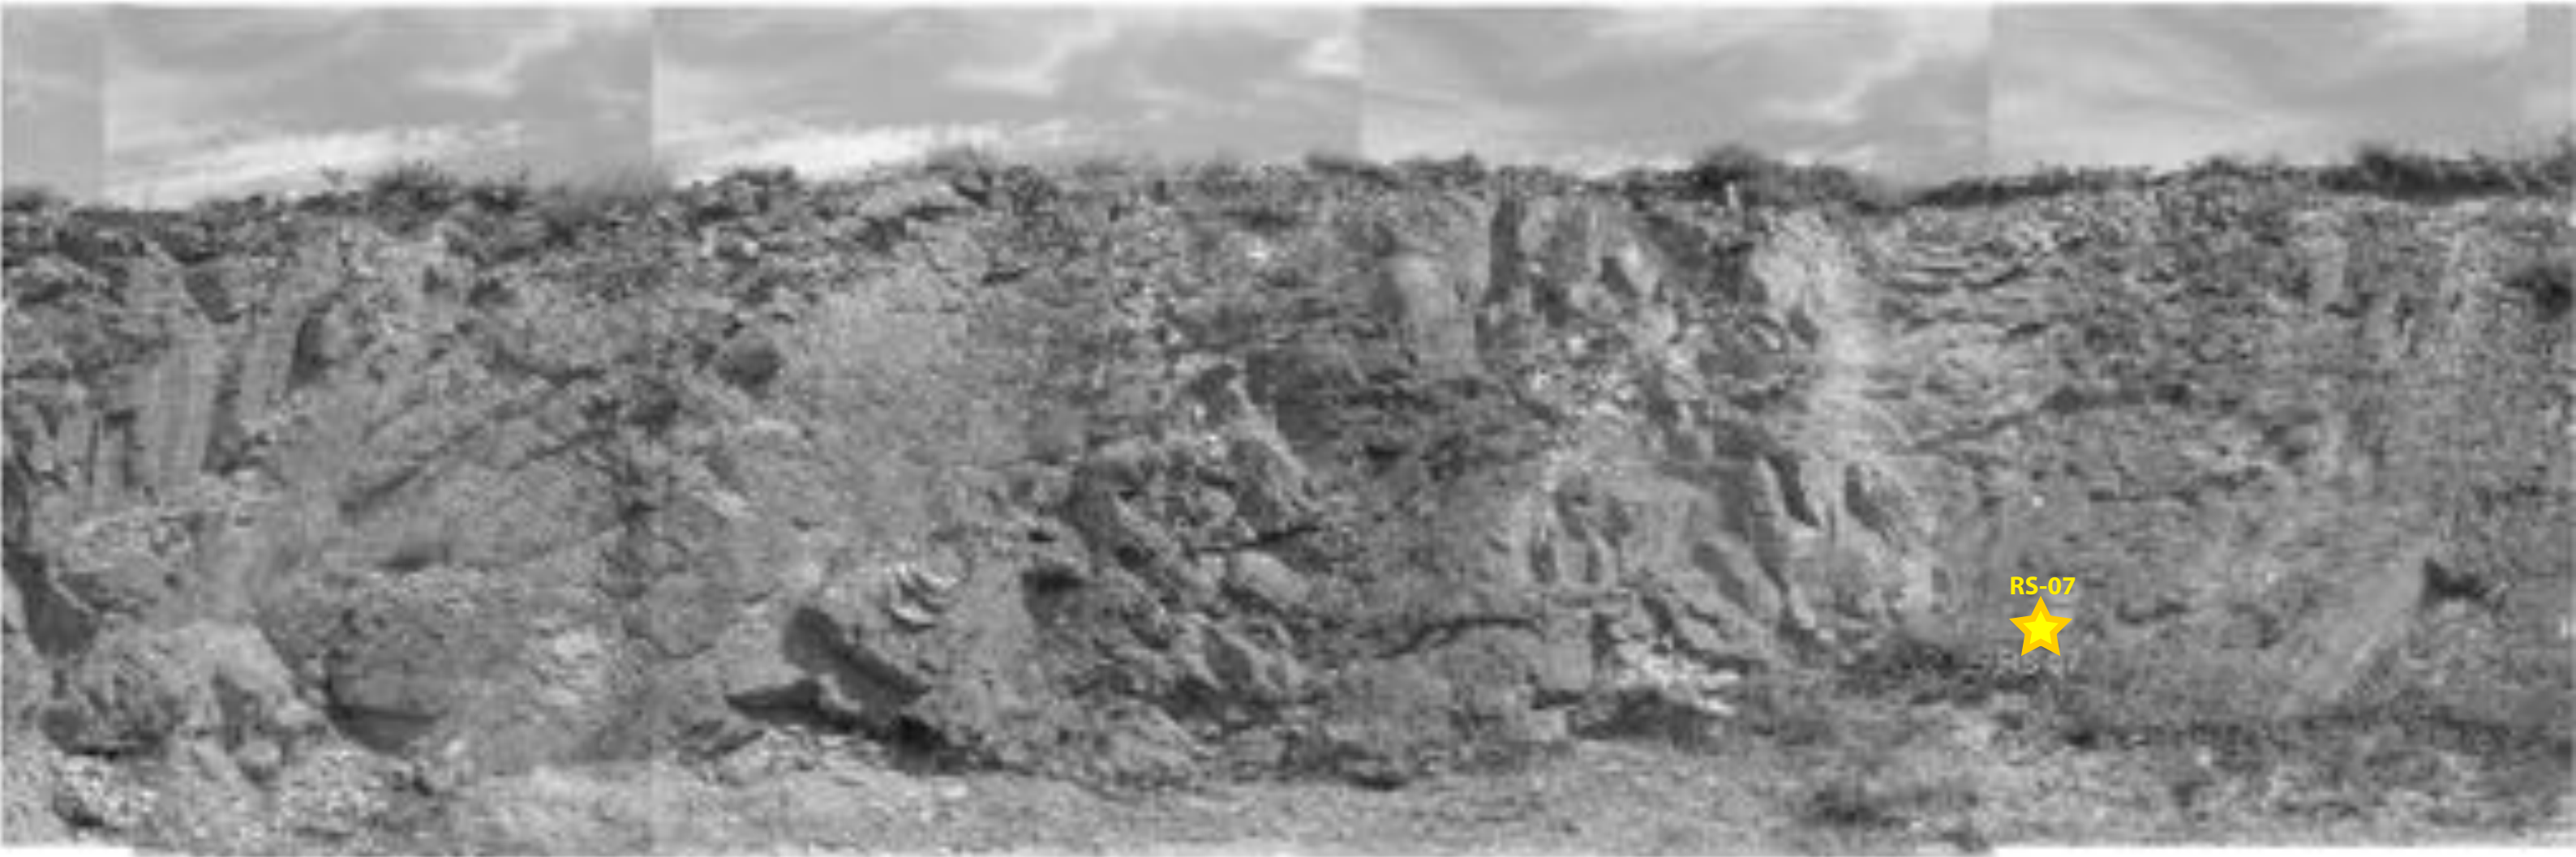



Westside

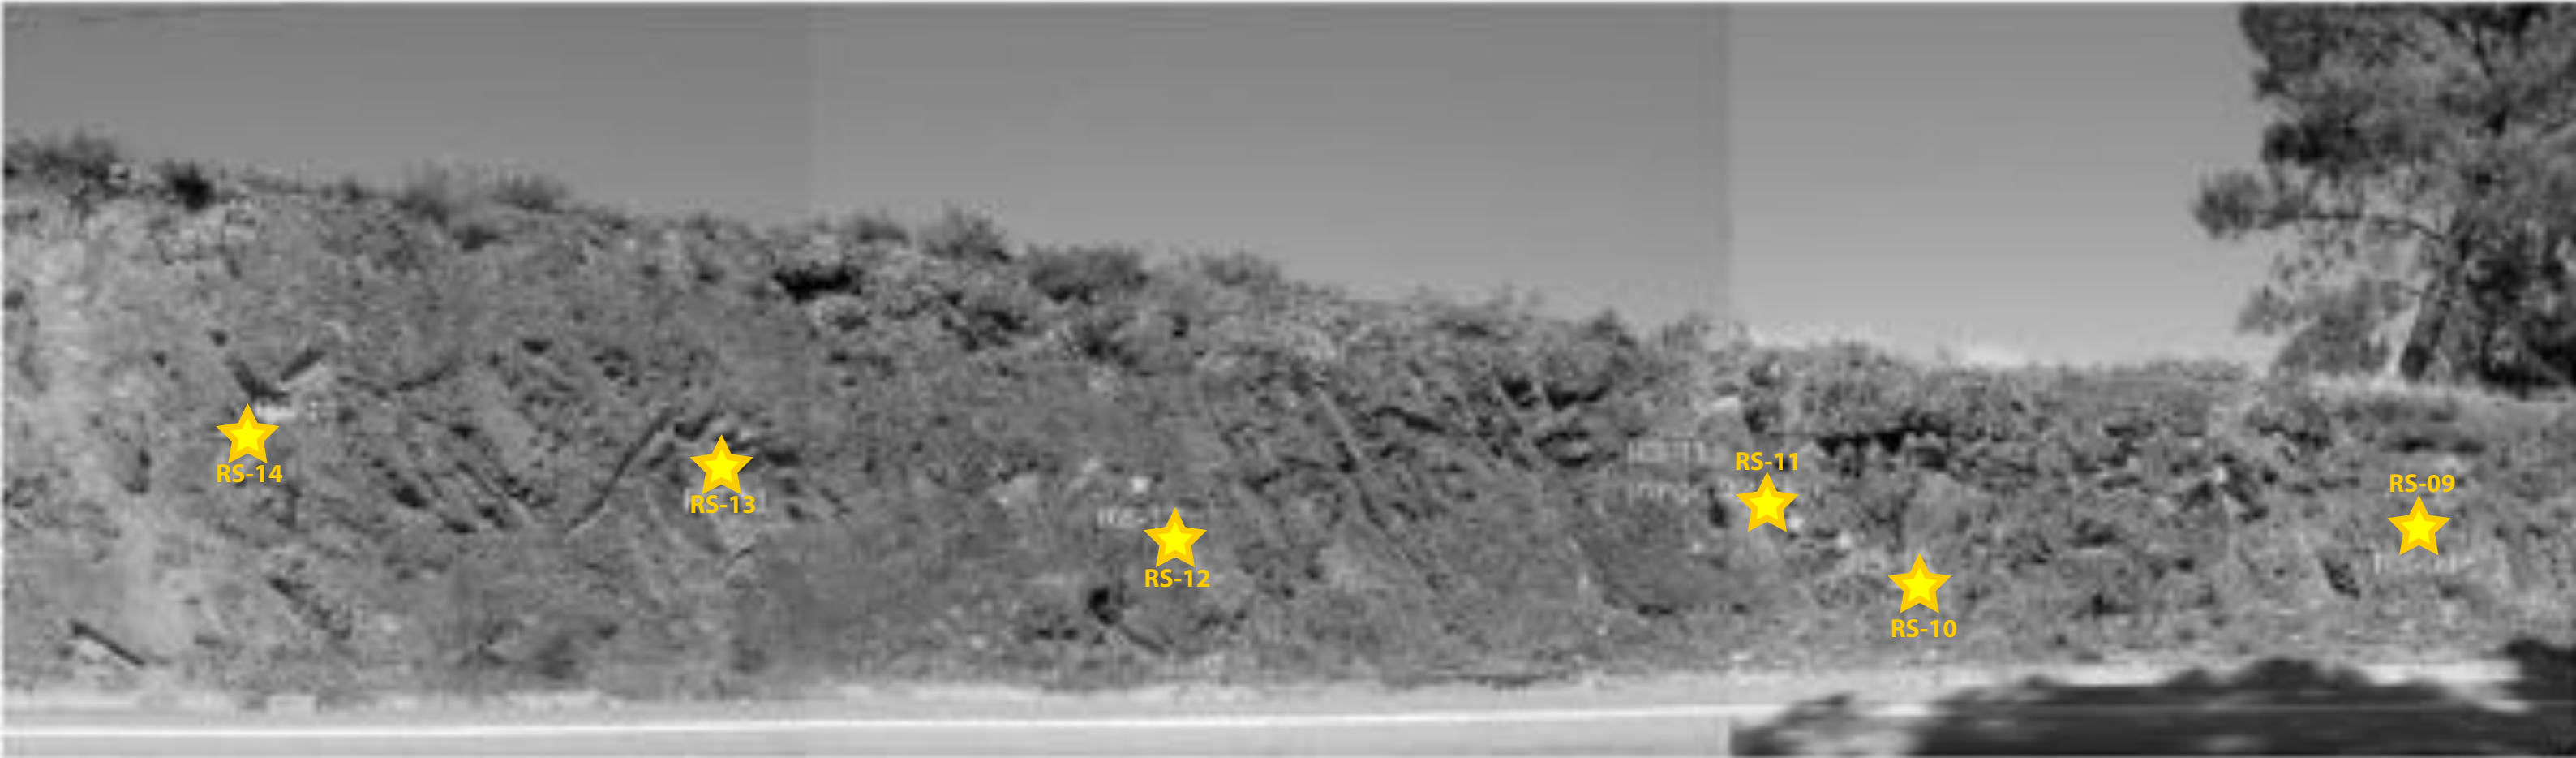

Eastside

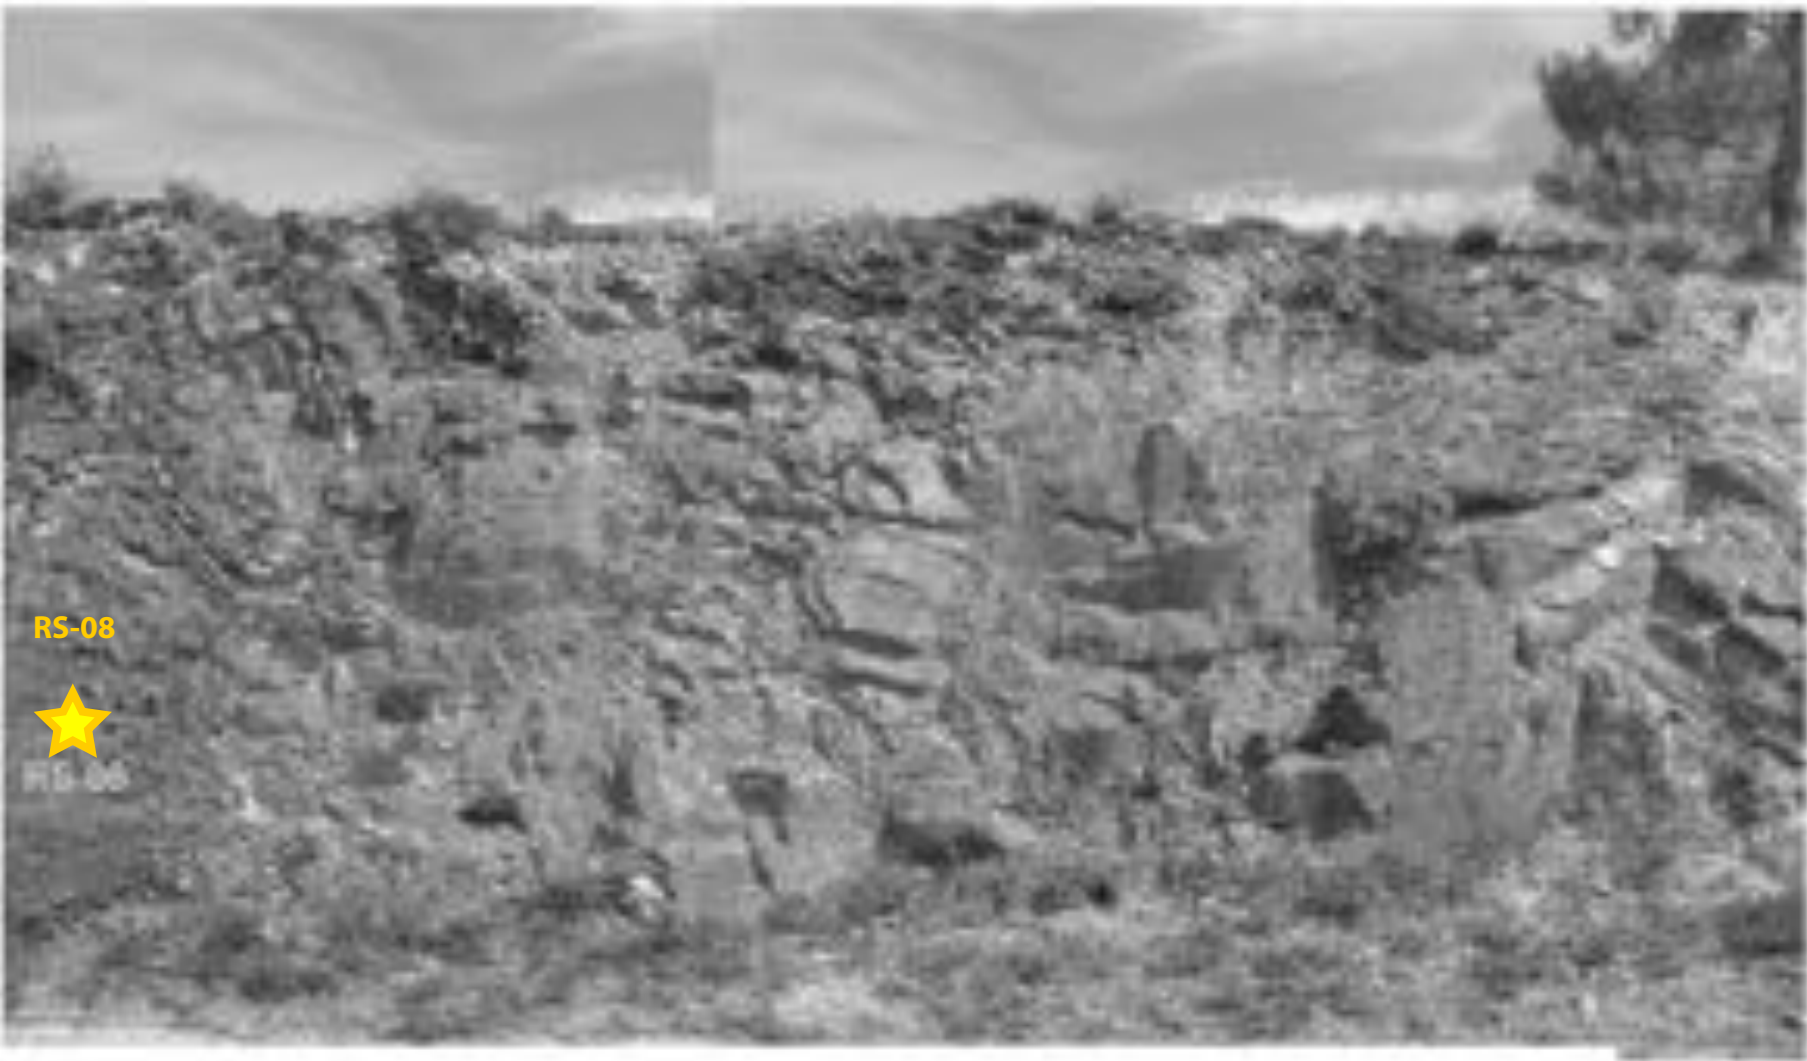



0 50 100

1A

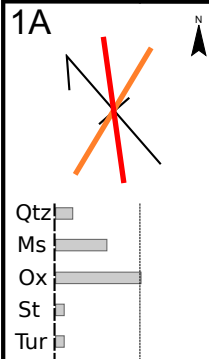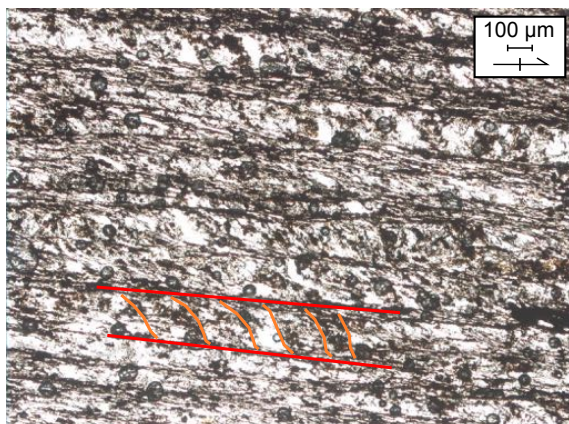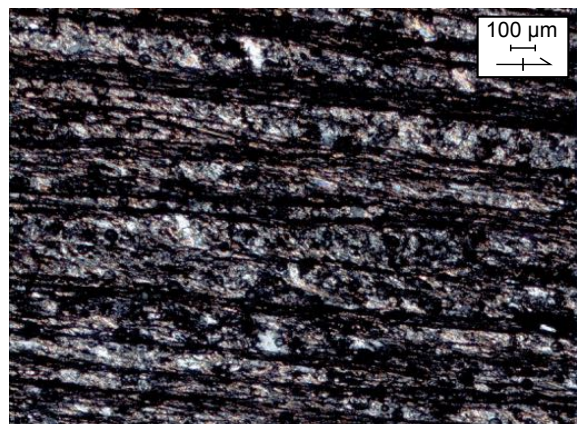

1B

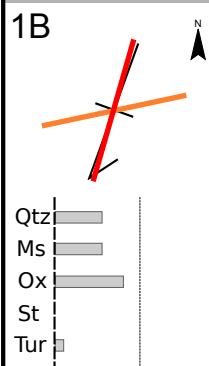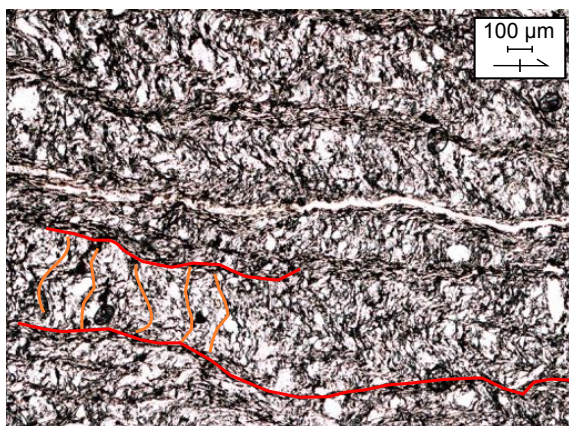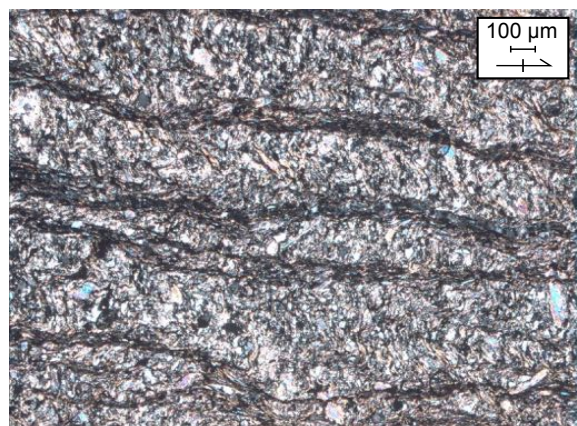

1C

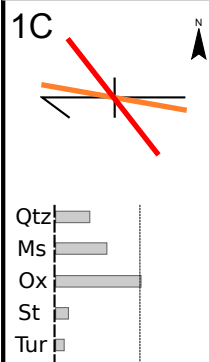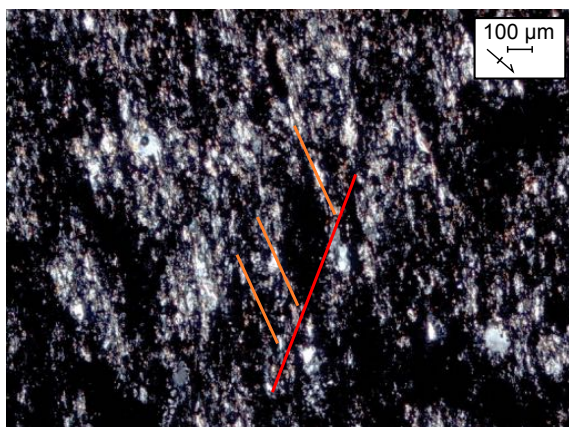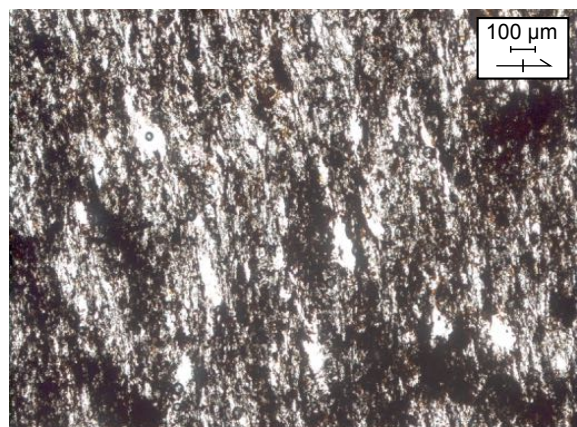



0 50 100

5

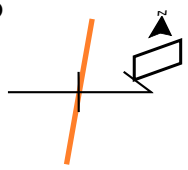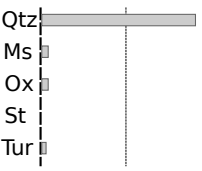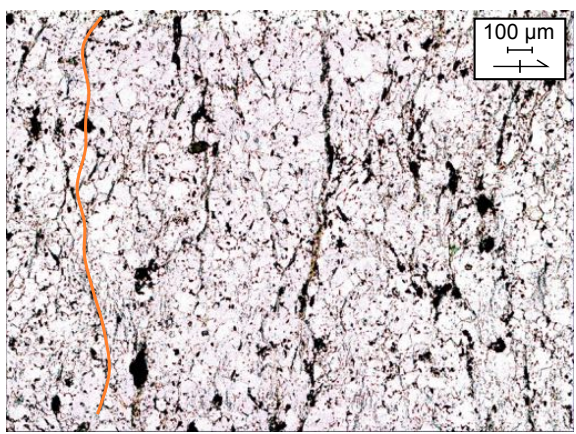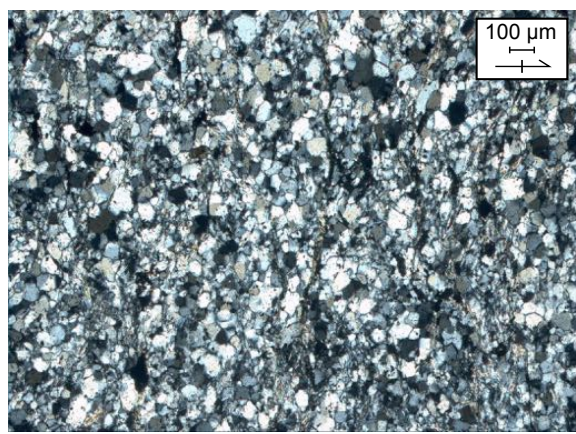

6

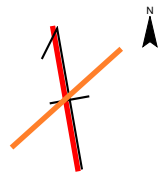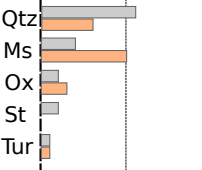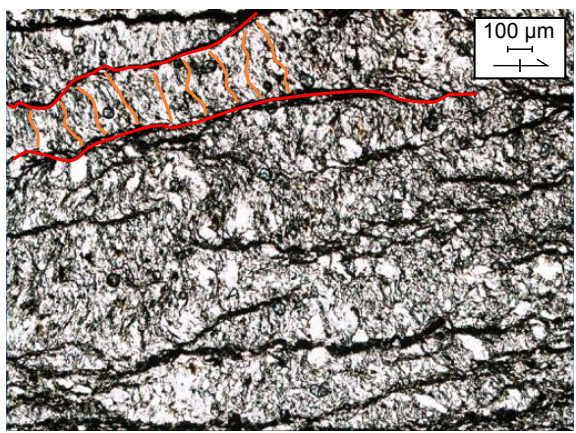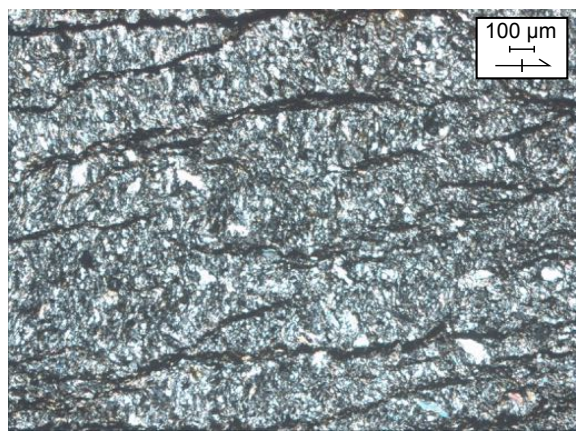

6i

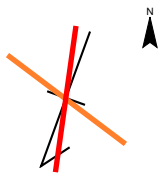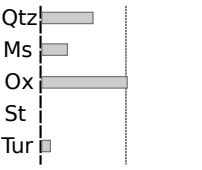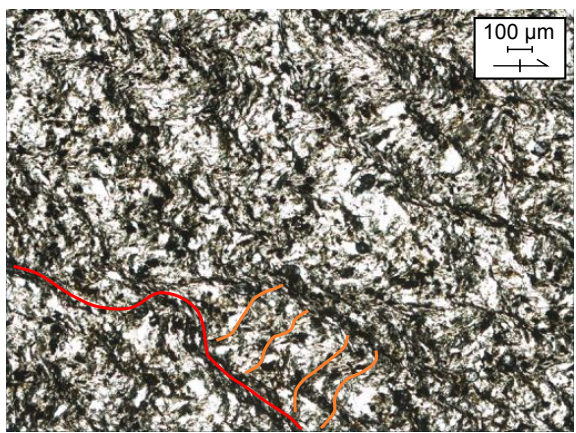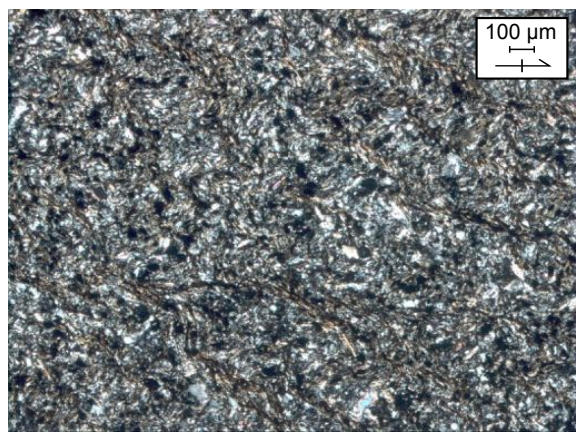



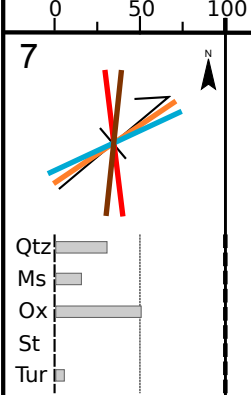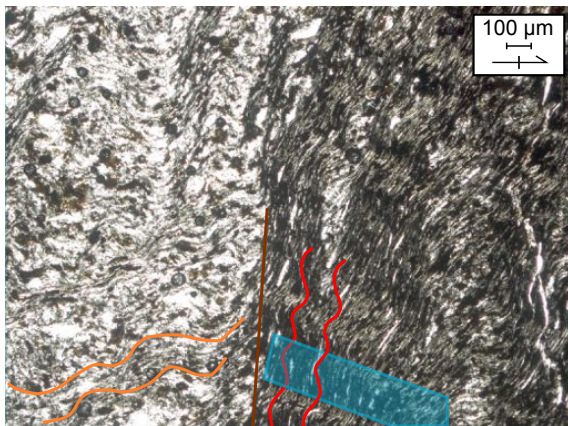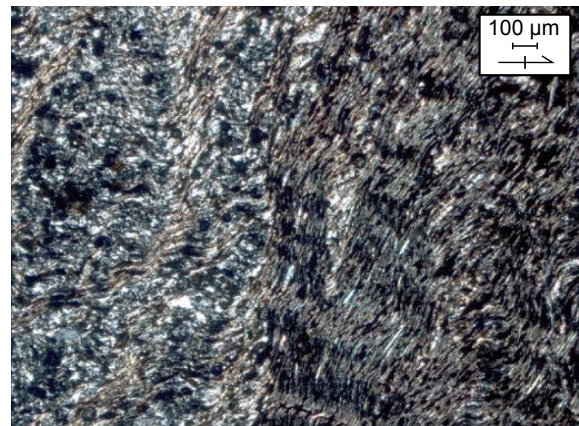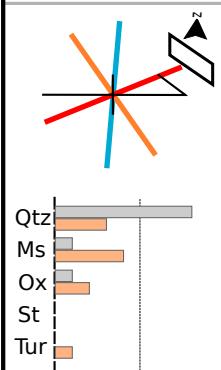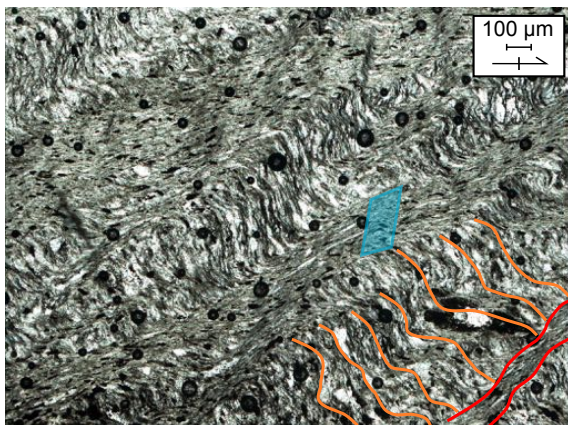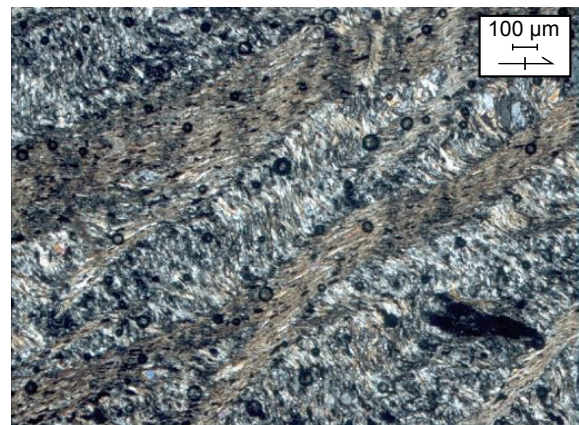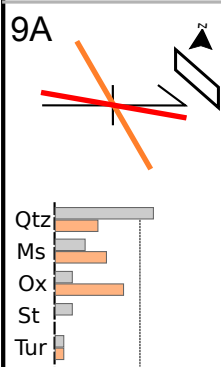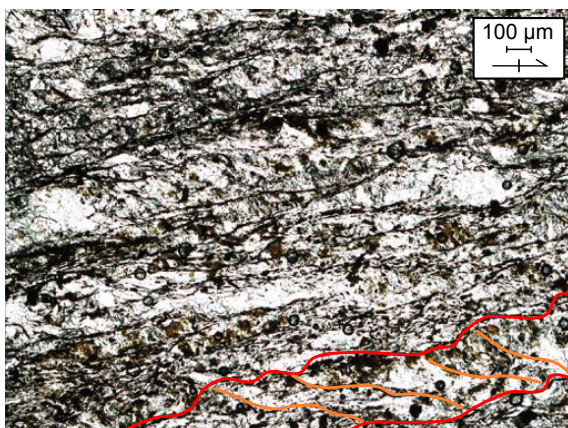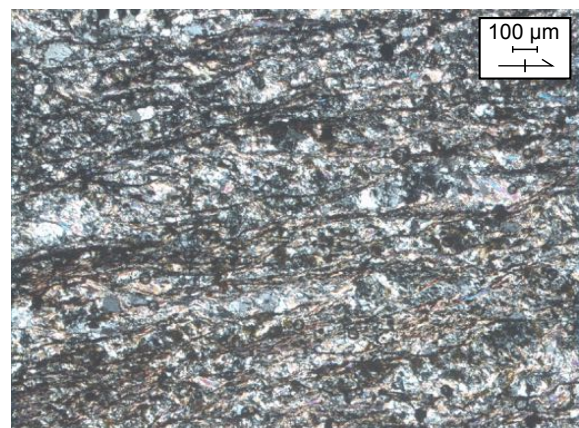



0 50 100

9B

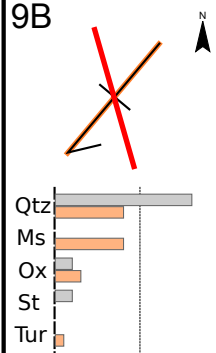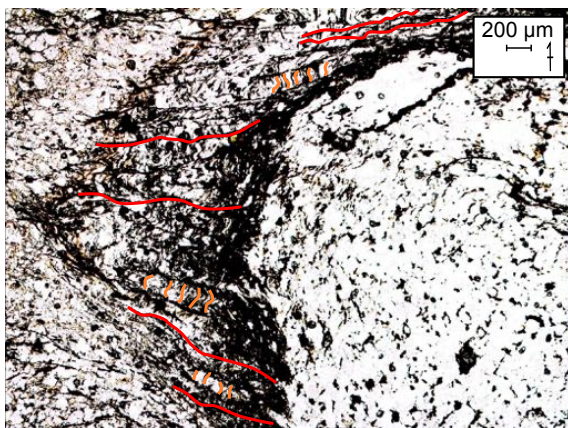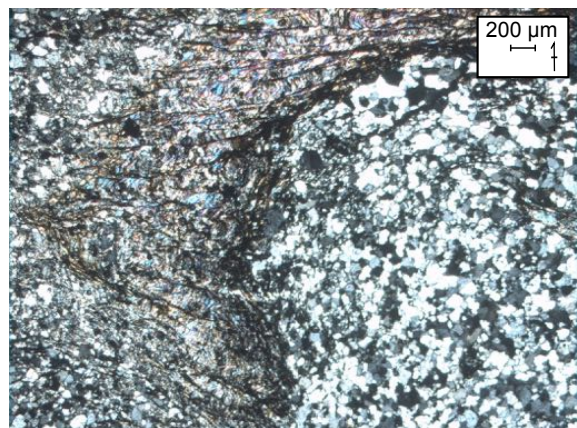

10

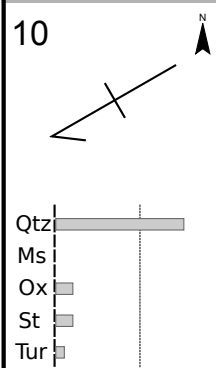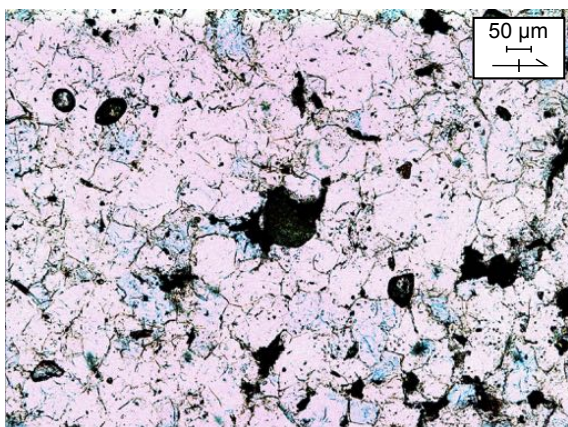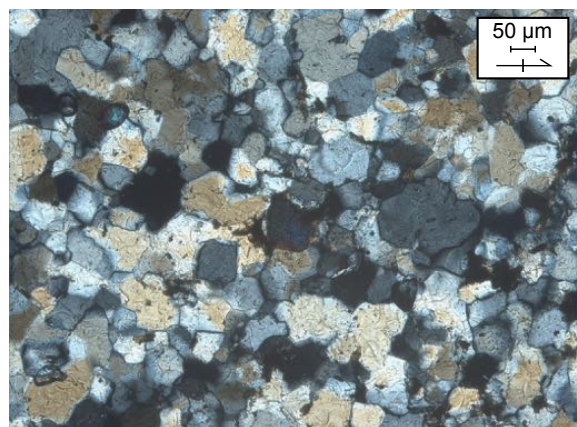

11A

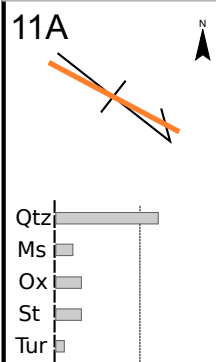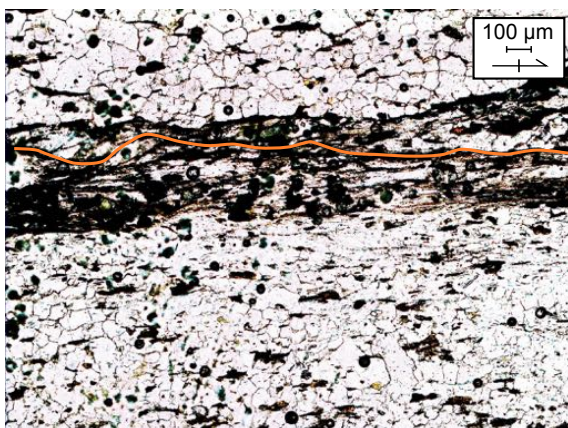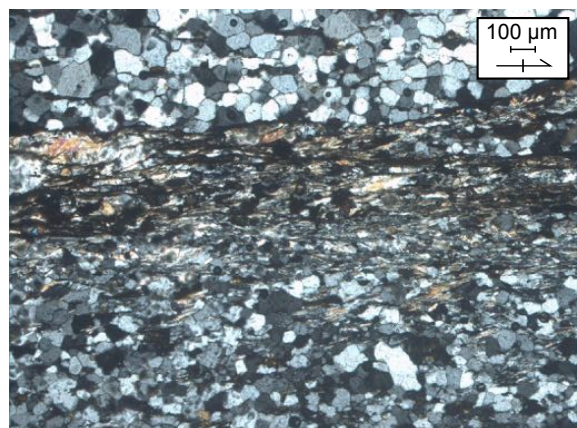



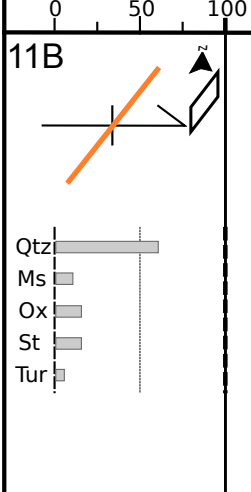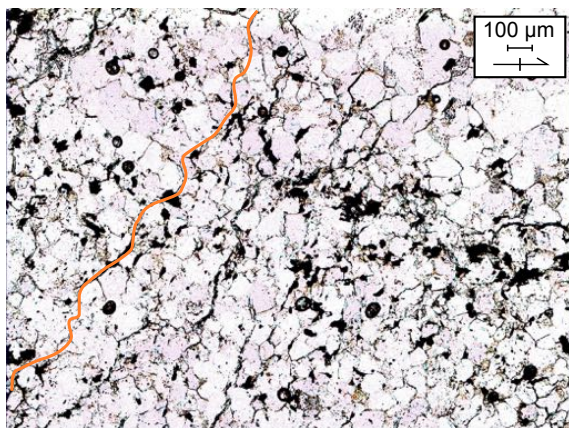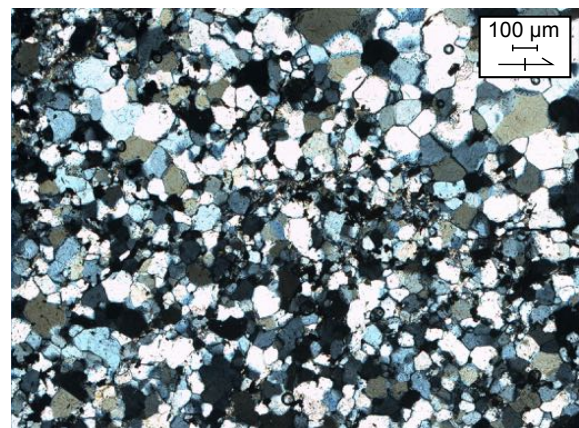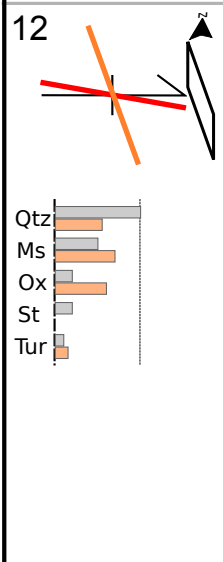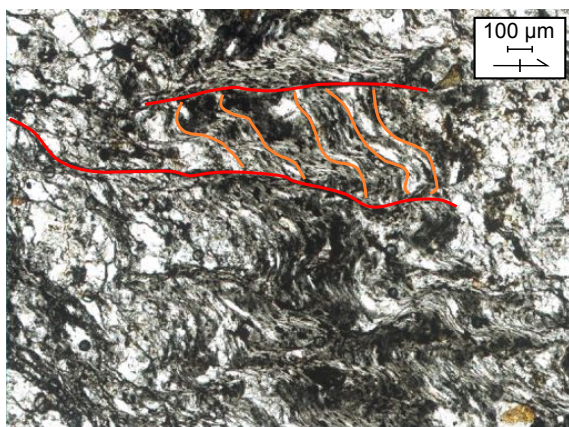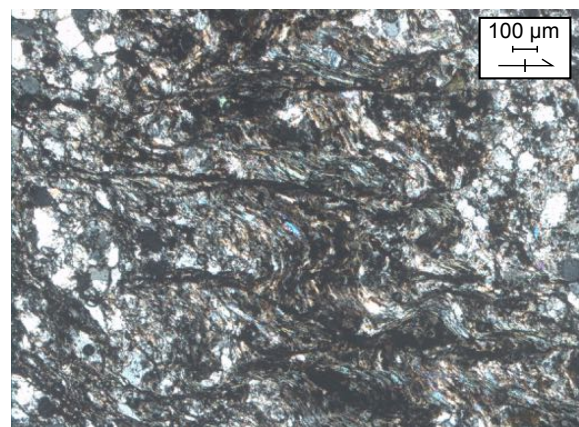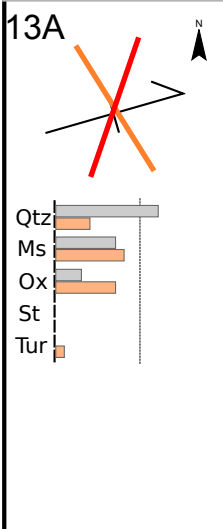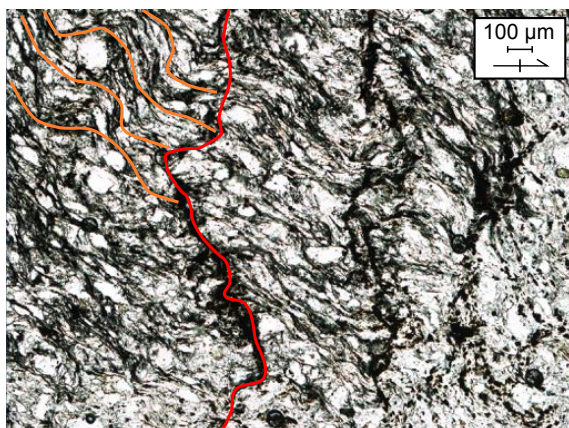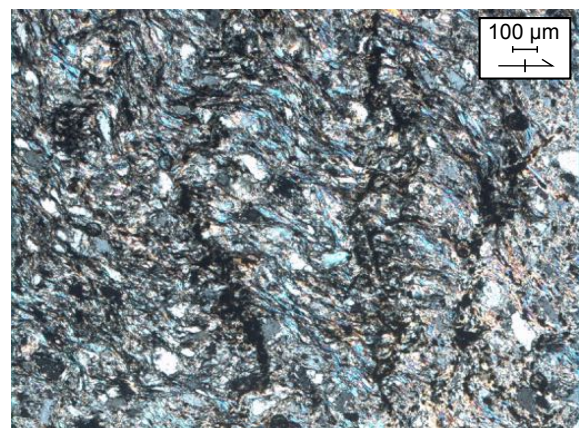



0 50 100

13B

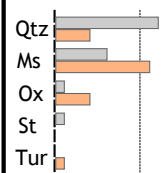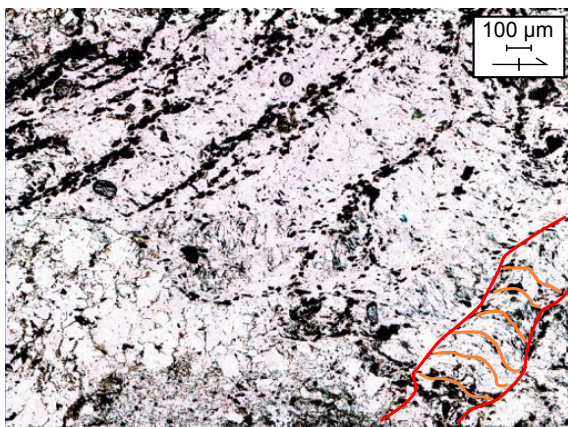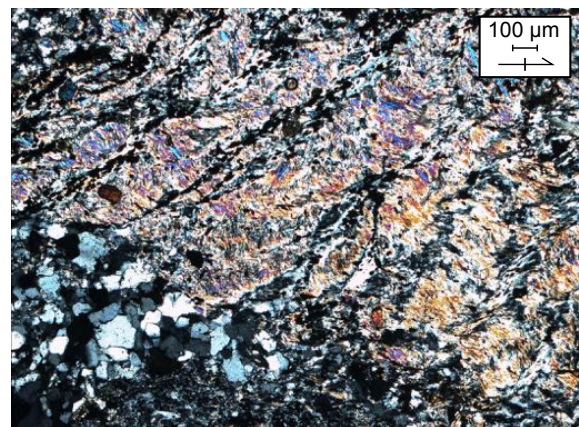

14

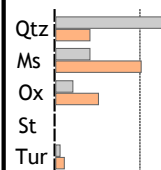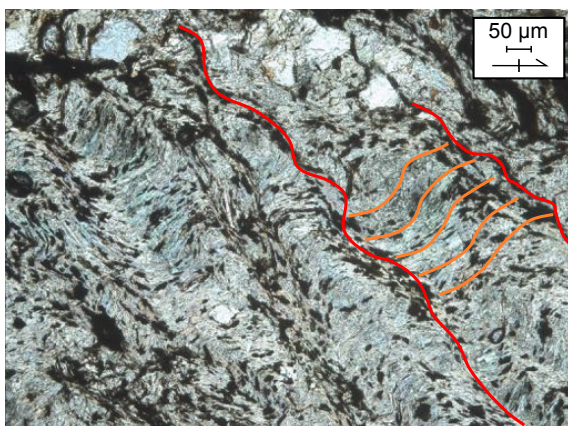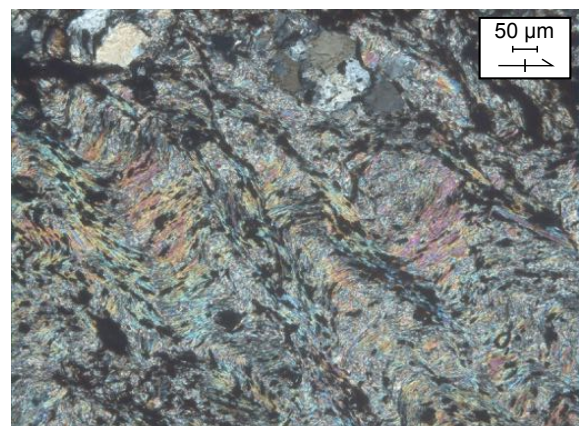

15A

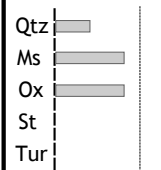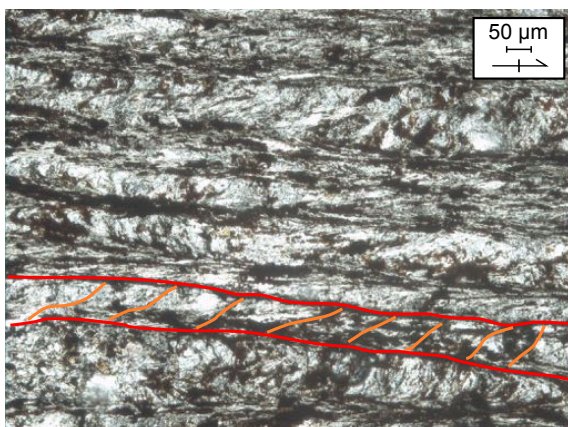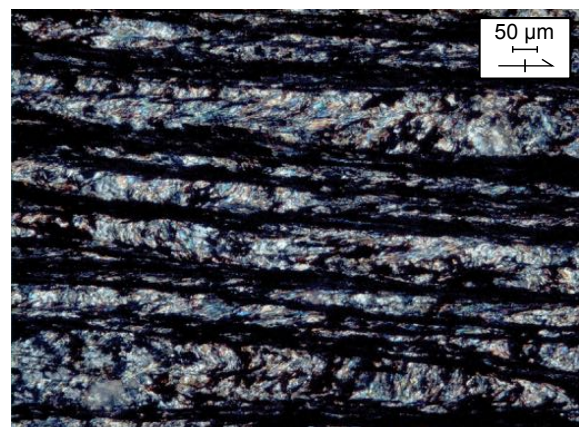



0 50 100

15B

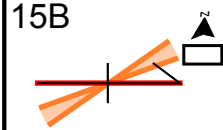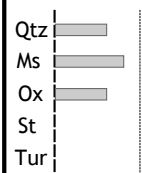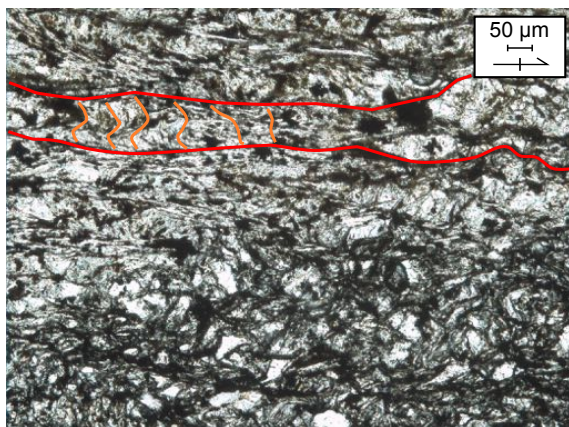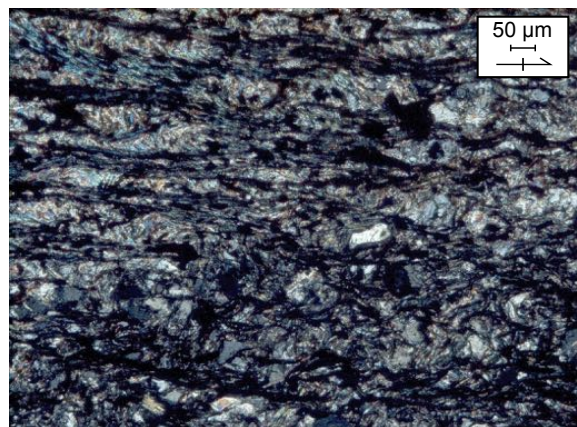

15C

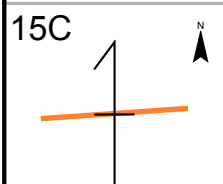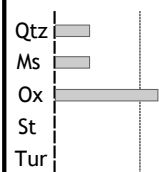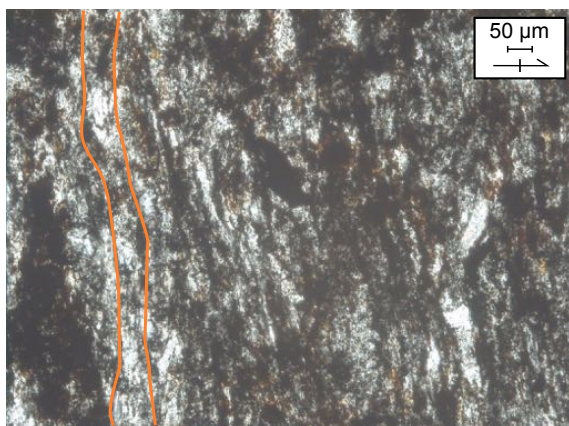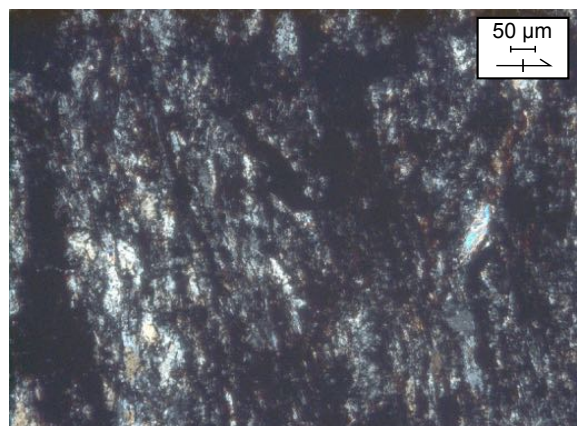

16

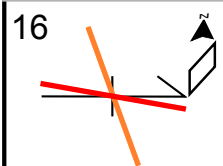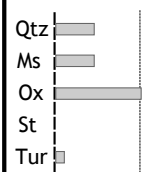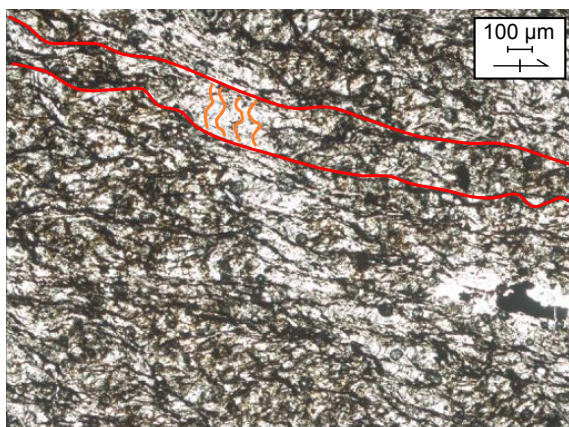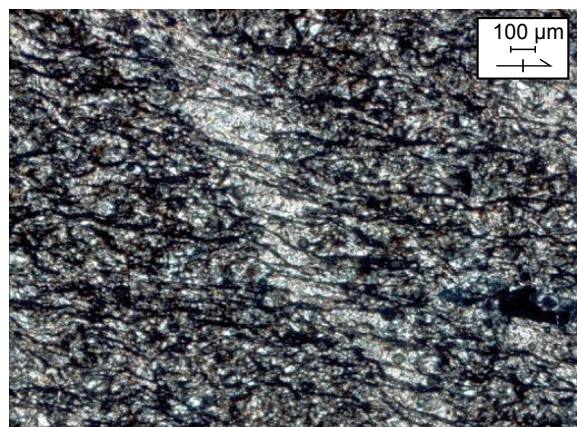



0 50 100

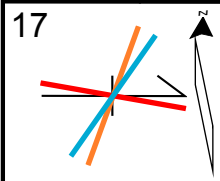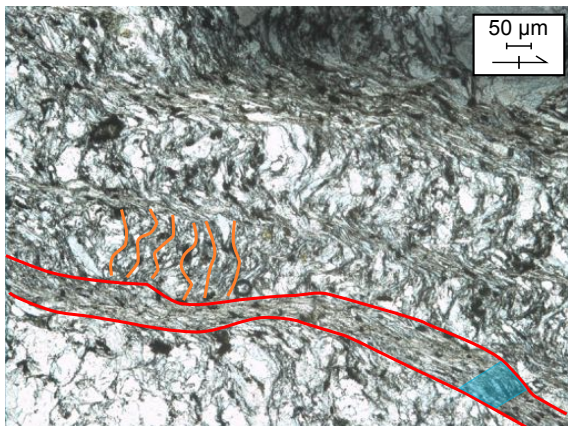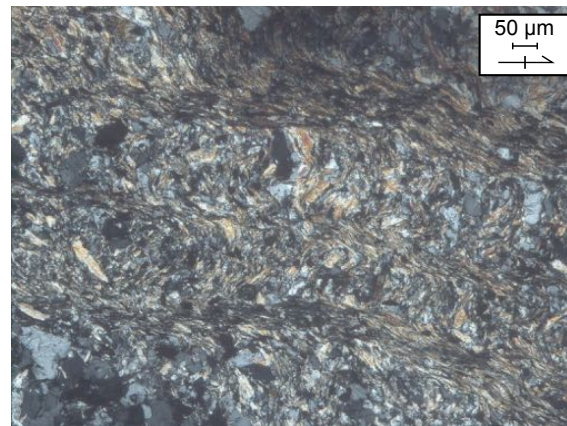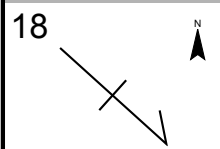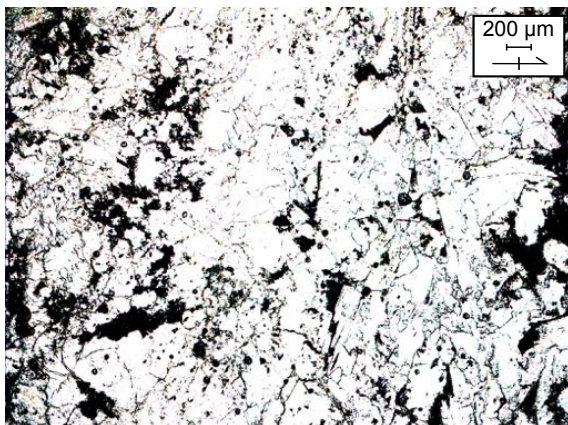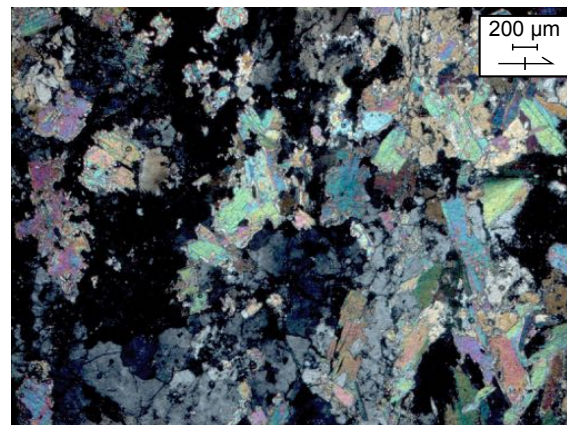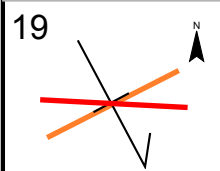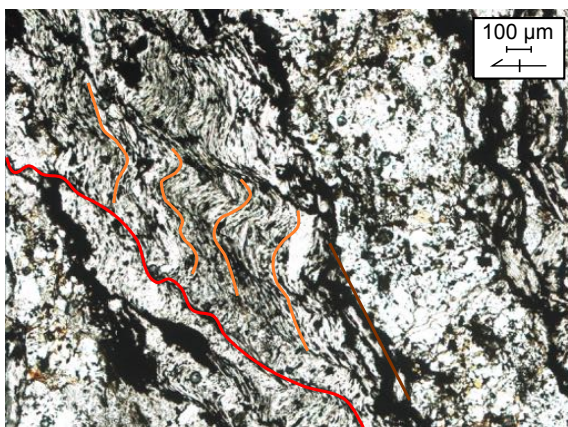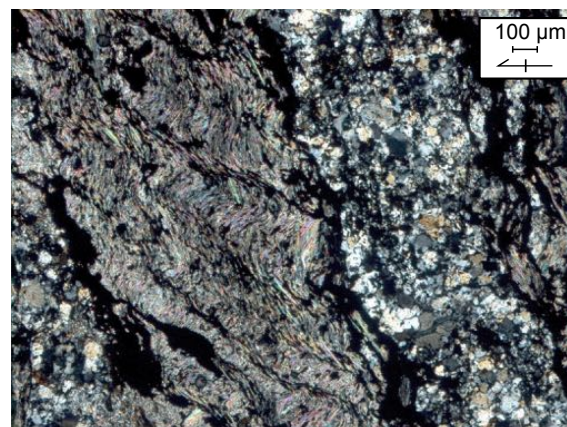



## Tourmalines

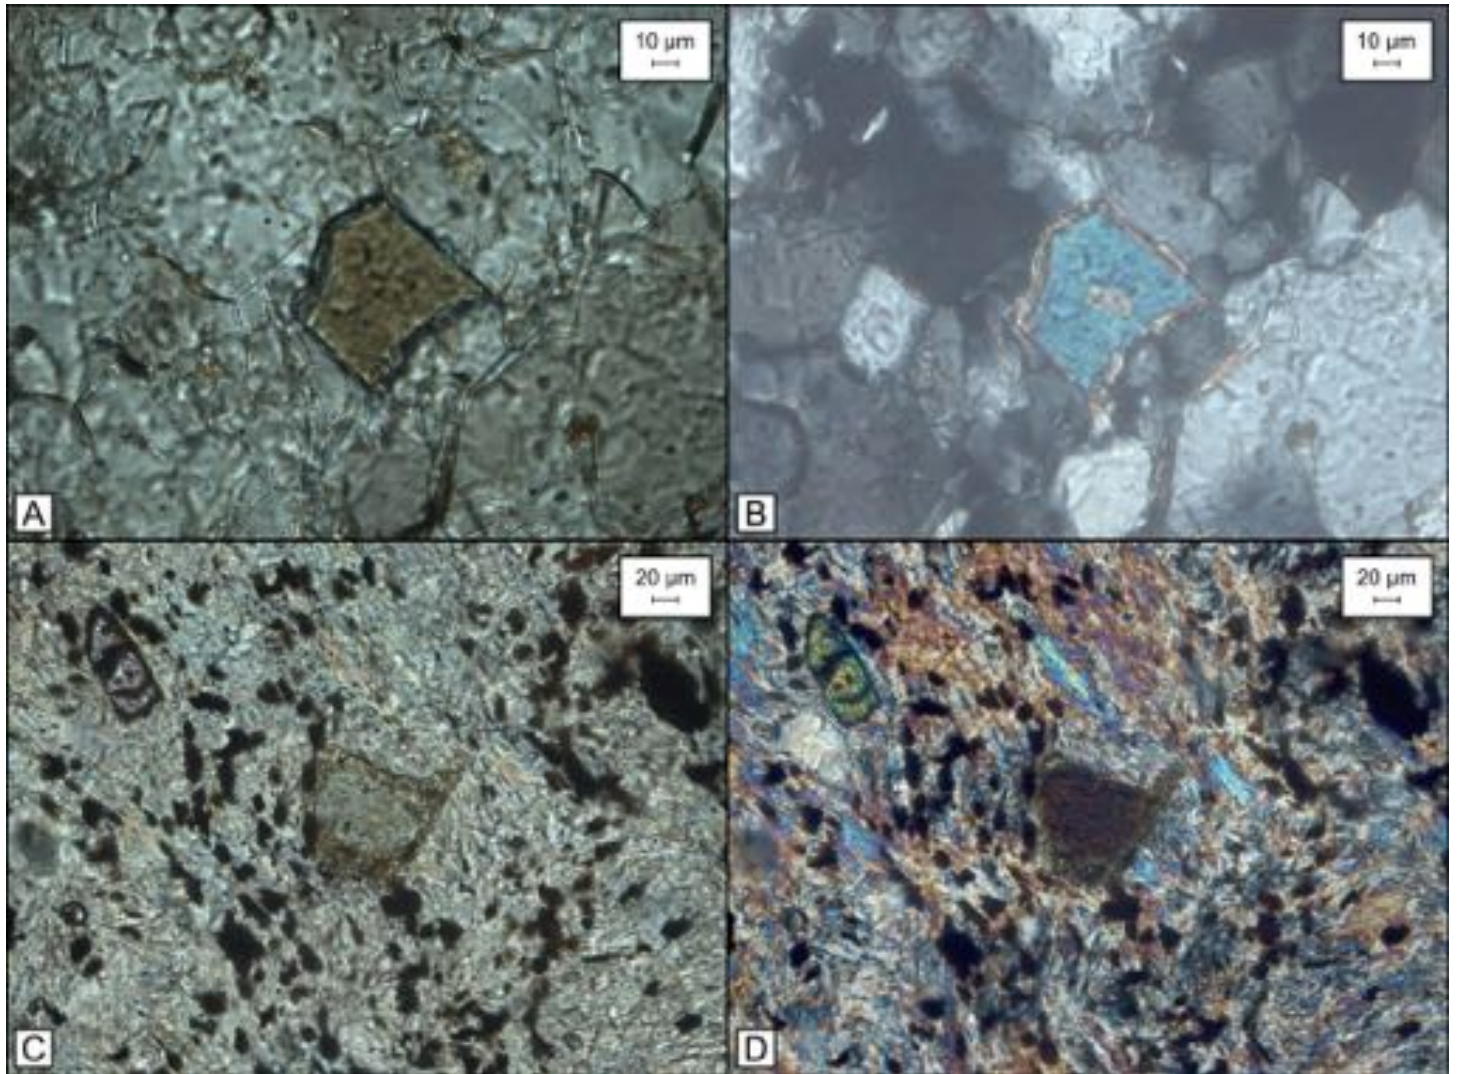

## Staurolite

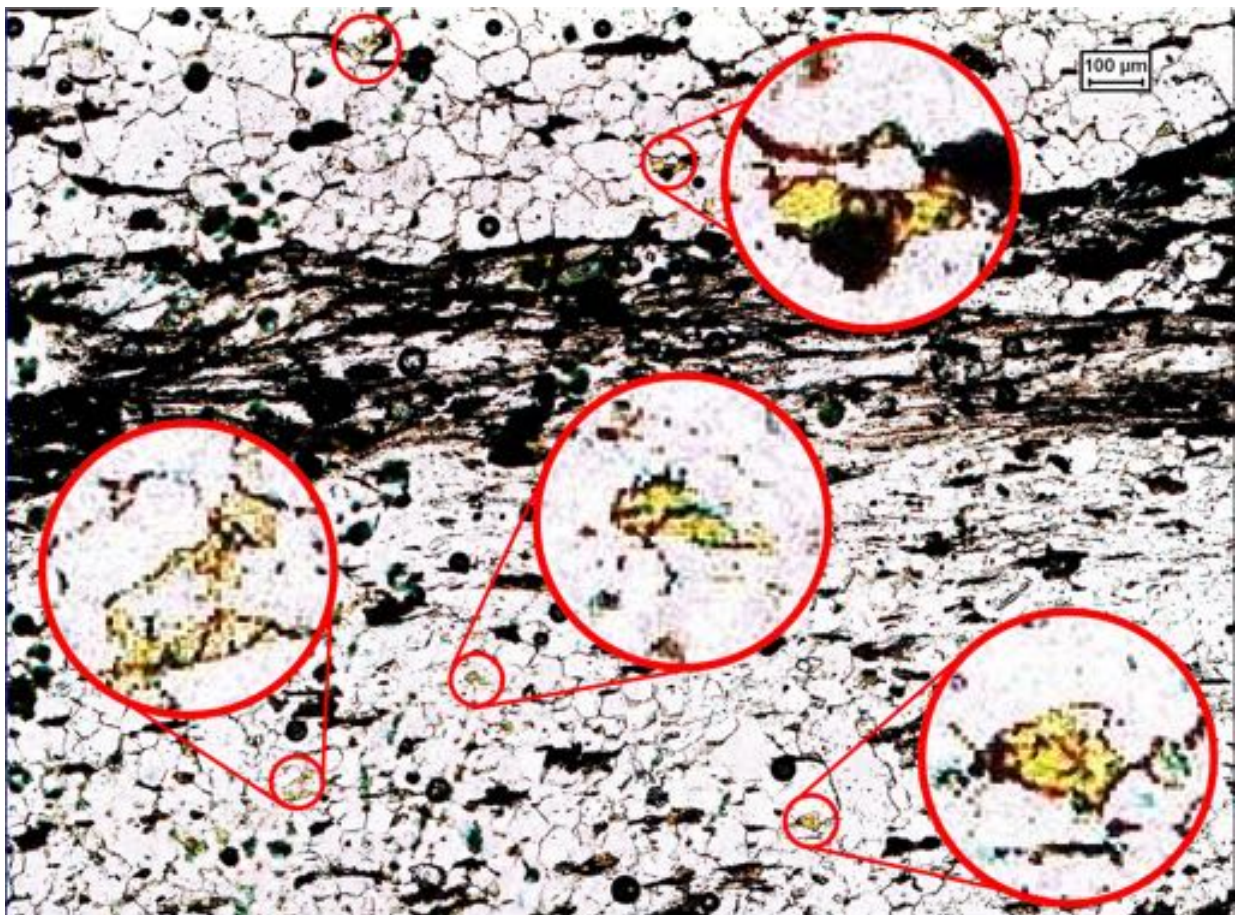

Supplement: Supplementary file 1 [file 1]
